# Supplementary material for: Who’s at Risk? A Prognostic Model for Severity Prediction in Pediatric Acute Pancreatitis
Source: PubMed Central journal article supplement (PMC8020899; doi:10.1097/mpg.0000000000002807), 2020-10

**Supplemental Table 1: Complete list of the admission biochemical characteristics of validation cohort patients with AP**

|                                              | <b>SAP<br/>(n=22)</b>           | <b>Mild AP<br/>(n=51)</b>       | <b>p-value</b> |
|----------------------------------------------|---------------------------------|---------------------------------|----------------|
| <b>Lipase x ULN</b>                          | 23.8 (5.6-45.9) <i>n=21</i>     | 12.3 (6.9-42.9) <i>n=48</i>     | 0.66           |
| <b>Amylase x ULN</b>                         | 4.1 (2.4-10.5) <i>n=19</i>      | 2.2 (1.4-7.1) <i>n=40</i>       | 0.15           |
| <b>Albumin, g/dL</b>                         | 3.3 (3.1-4.2) <i>n=21</i>       | 4.0 (3.6-4.6) <i>n=47</i>       | <b>0.005</b>   |
| <b>Anion Gap, mmol/L</b>                     | 12.0 (8.0-16.0) <i>n=21</i>     | 12.0 (10.0-15.0) <i>n=51</i>    | 0.74           |
| <b>WBC, 10<sup>3</sup>/microL</b>            | 13.1 (5.8-17.3) <i>n=19</i>     | 9.8 (6.5-13.8) <i>n=39</i>      | 0.38           |
| <b>Creatinine, mg/dL</b>                     | 0.5 (0.4-0.7) <i>n=22</i>       | 0.5 (0.4-0.7) <i>n=51</i>       | 0.94           |
| <b>Calcium, mg/dL</b>                        | 9.2 (8.8-9.5) <i>n=22</i>       | 9.3 (8.9-9.7) <i>n=51</i>       | 0.29           |
| <b>AST, Unit/L</b>                           | 32.0 (24.0-63.0) <i>n=21</i>    | 38.0 (22.0-80.0) <i>n=47</i>    | 0.69           |
| <b>ALT, Unit/L</b>                           | 29.0 (21.0-57.0) <i>n=21</i>    | 31.0 (24.0-135.0) <i>n=47</i>   | 0.39           |
| <b>Hematocrit, %</b>                         | 39.4 (33.2-41.9) <i>n=19</i>    | 37.3 (34.4-39.8) <i>n=39</i>    | 0.53           |
| <b>Hemoglobin, g/dL</b>                      | 13.7 (11.0-14.5) <i>n=19</i>    | 12.9 (11.7-14.1) <i>n=39</i>    | 0.89           |
| <b>BUN, mg/dL</b>                            | 14.5 (11.0-19.0) <i>n=22</i>    | 11.0 (8.0-13.0) <i>n=51</i>     | <b>0.002</b>   |
| <b>Alk Phosphorus, Unit/L</b>                | 163.0 (137.0-207.0) <i>n=21</i> | 138.5 (91.0-225.0) <i>n=46</i>  | 0.54           |
| <b>Glucose, mg/dL</b>                        | 97.5 (80.0-138.0) <i>n=22</i>   | 99.0 (89.0-118.0) <i>n=51</i>   | 0.75           |
| <b>Triglyceride, mg/dL</b>                   | 49.5 (35.0-69.0) <i>n=10</i>    | 68.0 (50.0-115.0) <i>n=21</i>   | 0.06           |
| <b>Sodium, mmol/L</b>                        | 138.5 (136.0-140.0) <i>n=22</i> | 140.0 (138.0-142.0) <i>n=51</i> | 0.11           |
| <b>Chloride, mmol/L</b>                      | 103.5 (101.0-106.0) <i>n=22</i> | 104.0 (101.0-106.0) <i>n=51</i> | 0.91           |
| <b>Total Bilirubin, mg/dL</b>                | 0.5 (0.4-0.9) <i>n=21</i>       | 0.6 (0.4-1.1) <i>n=47</i>       | 0.50           |
| <b>CRP, mg/dL</b>                            | 1.3 (0.5-6.6) <i>n=11</i>       | 1.1 (0.6-3.0) <i>n=29</i>       | 0.83           |
| <b>Potassium, mmol/L</b>                     | 4.1 (3.9-4.6) <i>n=21</i>       | 4.1 (3.7-4.4) <i>n=51</i>       | 0.64           |
| <b>Total protein, g/dL</b>                   | 6.6 (5.9-7.6) <i>n=21</i>       | 7.1 (6.5-7.5) <i>n=47</i>       | 0.20           |
| <b>Platelet count, 10<sup>3</sup>/microL</b> | 288.0 (154.0-393.0) <i>n=19</i> | 261.0 (219.0-326.0) <i>n=39</i> | 0.67           |
| <b>CO2, mmol/L</b>                           | 24.5 (18.0-27.0) <i>n=22</i>    | 24.0 (22.0-25.0) <i>n=51</i>    | 0.93           |

Data presented as median (25<sup>th</sup>-75<sup>th</sup> percentile) or n (%)

**Supplemental Table 2: BUN Change admission to 24-48 hours, patient characteristics**

|                                                                        | <b>All<br/>N=176</b>                 | <b>Mild AP<br/>N=137</b>            | <b>SAP*<br/>N=39</b>                | <b>P-value†</b> |
|------------------------------------------------------------------------|--------------------------------------|-------------------------------------|-------------------------------------|-----------------|
| <b>Age at admission (years)</b>                                        | 13.5 (8.7, 15.6)                     | 13.5 (9.3, 15.6)                    | 12.3 (7.7, 15.5)                    | 0.29            |
| <b>Sex (female)</b>                                                    | 96 (55%)                             | 77 (56%)                            | 19 (49%)                            | 0.41            |
| <b>Fluid type</b>                                                      |                                      |                                     |                                     | 0.37            |
| <b>Isotonic</b>                                                        | 58/157 (37%)                         | 47/121 (39%)                        | 11/36 (31%)                         |                 |
| <b>Hypotonic</b>                                                       | 88/157 (56%)                         | 67/121 (55%)                        | 21/36 (58%)                         |                 |
| <b>TPN/Other</b>                                                       | 11/157 (7%)                          | 7/121 (6%)                          | 4/36 (11%)                          |                 |
| <b>Fluid rate</b>                                                      |                                      |                                     |                                     | 0.73            |
| <b>&lt; 1.5x maintenance</b>                                           | 76/160 (47%)                         | 58/122 (48%)                        | 18/38 (47%)                         |                 |
| <b>1.5 - &lt;2x maintenance</b>                                        | 70/160 (44%)                         | 52/122 (43%)                        | 18/38 (47%)                         |                 |
| <b>≥ 2x maintenance</b>                                                | 14/160 (9%)                          | 12/122 (10%)                        | 2/38 (5%)                           |                 |
| <b>Feeds on admission</b>                                              |                                      |                                     |                                     | -               |
| <b>NPO</b>                                                             | 134/165 (81%)                        | 101/128 (79%)                       | 33/37 (89%)                         |                 |
| <b>Clear liquid diet</b>                                               | 17/165 (10%)                         | 16/128 (13%)                        | 1/37 (3%)                           |                 |
| <b>PO general diet</b>                                                 | 10/165 (6%)                          | 7/128 (5%)                          | 3/37 (8%)                           |                 |
| <b>PO low fat diet</b>                                                 | 3/165 (2%)                           | 3/128 (2%)                          | 0/37 (0%)                           |                 |
| <b>Feeds through existing enteral tube</b>                             | 1/165 (1%)                           | 1/128 (1%)                          | 0/37 (0%)                           |                 |
| <b>IV bolus within 6 hours</b>                                         | 103/162 (64%)                        | 75/125 (60%)                        | 28/37 (76%)                         | 0.08            |
| <b>BUN admission (mg/dL)</b>                                           | 11.0 (8.0, 15.0)                     | 10.0 (8.0-13.0)                     | 15.5 (11.0-22.5)                    | <0.0001         |
| <b>BUN 24-48hrs (mg/dL)</b>                                            | 8.0 (6.0, 12.0)                      | 7.0 (5.0-10.0)                      | 12.5 (8.0-19.0)                     | <0.0001         |
| <b>BUN change (mg/dL)</b>                                              | -3.0 (-6.0, -1.0)                    | -3.0 (-5.0, -1.0)                   | -3.5 (-7.0, -1.0)                   | 0.32            |
| <b>BUN no change admission-24hrs</b>                                   | 15/143 (10%)                         | 13/109 (12%)                        | 2/34 (6%)                           | 0.52            |
| <b>BUN percent change from admission (includes all)</b>                | -23.5 (-44.4, -9.1)<br><i>n=143</i>  | -27.3 (-50.0, -9.1)<br><i>n=109</i> | -19.1 (-32.4, -9.4)<br><i>n=34</i>  | 0.22            |
| <b>BUN percent rise from admission (for those increased)</b>           | 25.0 (10.0, 40.0)<br><i>n=15</i>     | 25.0 (16.7, 40.0)<br><i>n=13</i>    | 19.8 (6.3, 33.3)<br><i>n=2</i>      | 0.60            |
| <b>BUN percent decrease from admission (for those decreased)</b>       | -33.3 (-50.0, -20.0)<br><i>n=113</i> | -35.7 (-52.9, -22.2)<br><i>n=83</i> | -21.5 (-38.5, -12.5)<br><i>n=30</i> | 0.002           |
| <b>BUN elevated admission (&gt;20 mg/dL)</b>                           | 15/162 (9%)                          | 3/126 (2%)                          | 12/36 (33%)                         | <0.0001         |
| <b>BUN elevated 24hrs (&gt;20 mg/dL)</b>                               | 10/145 (7%)                          | 2/111 (2%)                          | 8/34 (24%)                          | 0.0001          |
| <b>BUN elevated both at admission &amp; at 24 hours (&gt;20 mg/dL)</b> | 10/143 (7%)                          | 2/109 (2%)                          | 8/34 (24%)                          | 0.0002          |

Data presented as median (25<sup>th</sup>-75<sup>th</sup> percentile) or n (%).

\*SAP (moderately severe and severe AP)

†P-value is from testing differences between the Mild AP and SAP groups

**Supplemental Table 3: BUN Values and Resultant Statistics**

**A. Derived from the CHKD and CNH Data (n= 73)**

| <b>BUN Value<br/>(mg/dL)</b> | <b>Sensitivity</b> | <b>Specificity</b> | <b>PPV</b> | <b>NPV</b> |
|------------------------------|--------------------|--------------------|------------|------------|
| <b>10</b>                    | 77%                | 33%                | 33%        | 77%        |
| <b>11</b>                    | 77%                | 49%                | 40%        | 83%        |
| <b>12</b>                    | 73%                | 59%                | 43%        | 83%        |
| <b>13</b>                    | 68%                | 73%                | 52%        | 84%        |
| <b>14</b>                    | 59%                | 76%                | 52%        | 81%        |
| <b>15</b>                    | 50%                | 82%                | 55%        | 79%        |
| <b>16</b>                    | 45%                | 90%                | 67%        | 79%        |
| <b>17</b>                    | 41%                | 90%                | 64%        | 78%        |
| <b>18</b>                    | 36%                | 92%                | 67%        | 77%        |
| <b>19</b>                    | 27%                | 94%                | 67%        | 75%        |
| <b>21</b>                    | 23%                | 98%                | 83%        | 75%        |
| <b>23</b>                    | 18%                | 98%                | 80%        | 74%        |
| <b>24</b>                    | 14%                | 98%                | 75%        | 72%        |
| <b>37</b>                    | 14%                | 100%               | 100%       | 73%        |

**B. Derived from the BUN Change Cohort (CHKD & CCHMC) data (n=176)**

| BUN Value<br>(mg/dL) | Admission   |             |     |     | 24-48 hours |             |     |     |
|----------------------|-------------|-------------|-----|-----|-------------|-------------|-----|-----|
|                      | Sensitivity | Specificity | PPV | NPV | Sensitivity | Specificity | PPV | NPV |
| 10                   | 83%         | 38%         | 28% | 89% | 59%         | 71%         | 38% | 85% |
| 11                   | 78%         | 52%         | 31% | 89% | 59%         | 81%         | 49% | 87% |
| 12                   | 72%         | 60%         | 34% | 88% | 56%         | 84%         | 51% | 86% |
| 13                   | 69%         | 72%         | 42% | 89% | 50%         | 88%         | 57% | 85% |
| 14                   | 61%         | 79%         | 45% | 88% | 44%         | 94%         | 68% | 85% |
| 15                   | 56%         | 83%         | 48% | 87% | 41%         | 95%         | 70% | 84% |
| 16                   | 50%         | 88%         | 55% | 86% | 41%         | 95%         | 74% | 84% |
| 17                   | 47%         | 88%         | 53% | 85% | 35%         | 95%         | 71% | 83% |
| 18                   | 44%         | 91%         | 59% | 85% | 32%         | 95%         | 69% | 82% |
| 19                   | 42%         | 91%         | 59% | 85% | 26%         | 96%         | 69% | 81% |
| 20                   | 39%         | 94%         | 67% | 84% | 24%         | 97%         | 73% | 81% |
| 21                   | 33%         | 98%         | 80% | 84% | 24%         | 98%         | 80% | 81% |
| 22                   | 28%         | 98%         | 77% | 83% | 21%         | 98%         | 78% | 80% |
| 25                   | 19%         | 98%         | 70% | 81% | 18%         | 98%         | 75% | 80% |
| 32                   | 17%         | 99%         | 86% | 81% | NA          | NA          | NA  | NA  |

Supplemental Figure 1.

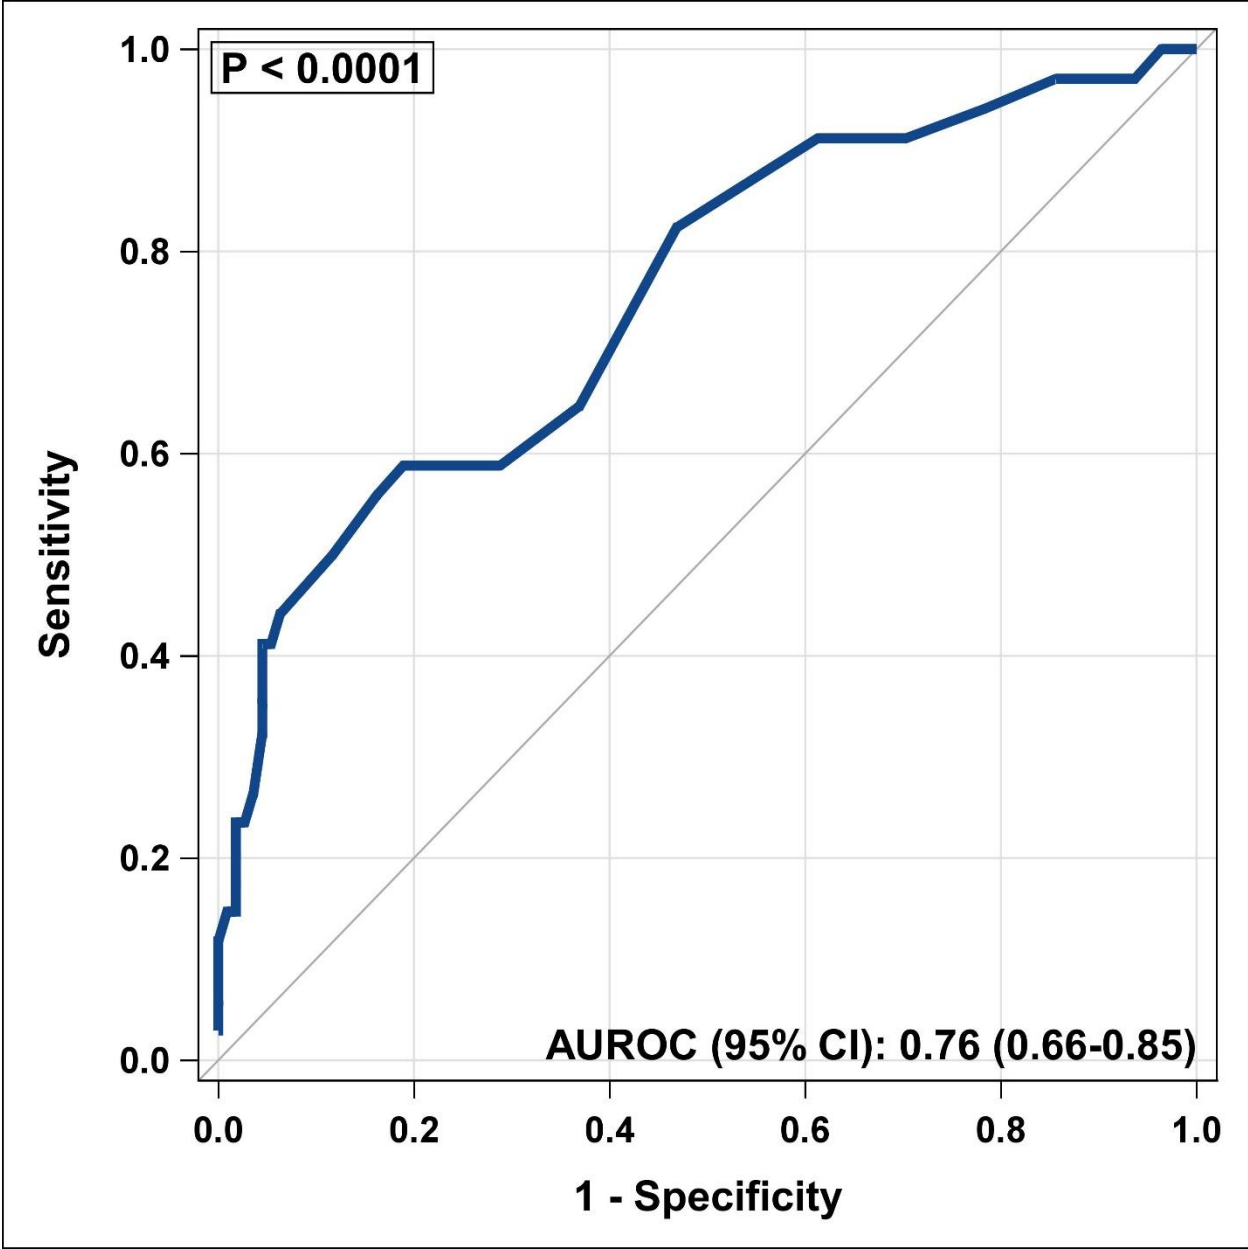

Supplement: NIHMS1682481-supplement-Supplementary_Tables_and_Figures.pdf [file NIHMS1682481-supplement-Supplementary_Tables_and_Figures.pdf]
